# Supplementary material
Source: HighWire-hosted journal article supplement (https://jaha.ahajournals.org/content/6/4/e005386)

# **SUPPLEMENTAL MATERIAL**

**Table S1.** Frequency of mechanisms of very late drug-eluting stent thrombosis, grouped by the usage of dual antiplatelet therapy (DAPT)

|                                                          | <b>DAPT at the time of stent thrombosis</b> |                  | <b>p</b> |
|----------------------------------------------------------|---------------------------------------------|------------------|----------|
|                                                          | <b>Yes (n=21)</b>                           | <b>No (n=77)</b> |          |
| Mechanisms                                               |                                             |                  | 0.729    |
| Stent malapposition or evagination                       | 9 (42.9)                                    | 27 (35.1)        |          |
| Uncovered struts without stent malapposition/evagination | 6 (28.6)                                    | 18 (23.4)        |          |
| Neoatherosclerosis                                       | 6 (28.6)                                    | 28 (36.4)        |          |
| Erosive neointima without neoatherosclerosis             | 0 (0)                                       | 4 (5.2)          |          |

Data are presented as number (%).

**Figure S1.** The annual frequency of patients with very late drug-eluting stent (DES) thrombosis

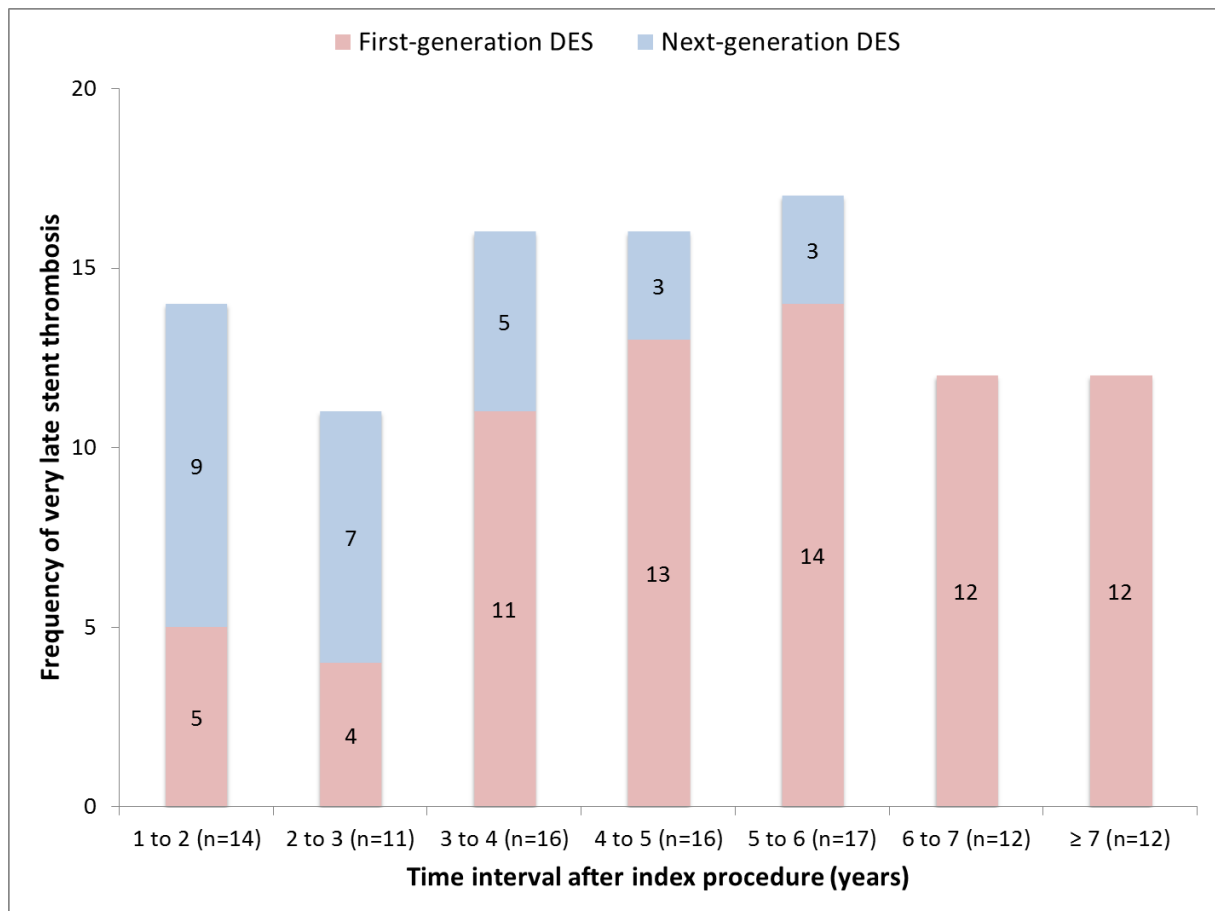

Supplement: inline-supplementary-material-1 [file inline-supplementary-material-1.pdf]
